## CORRECTION

# Correction: Anthropological responses to environmental challenges in SAARC nations: A comparative analysis

Chunyan Liu, Muneeb Ahmad, Ali Altalbe

The second author, Muneeb Ahmad, is incorrectly noted as the corresponding author. The correct corresponding author is Ali Altalbe. Ali Altalbe's email address is: [a.altalbe@psau.edu.sa](mailto:a.altalbe@psau.edu.sa).

The published funding statement is inaccurate. The correct funding statement is as follows: The authors extend their appreciation to Prince Sattam bin Abdulaziz University for funding this research work through the project number (PSAU/2024/01/224252).

## Reference

1. Liu C, Ahmad M, Altalbe A (2024) Anthropological responses to environmental challenges in SAARC nations: A comparative analysis. PLoS ONE 19(2): e0299863. <https://doi.org/10.1371/journal.pone.0299863>. PMID: 38330089

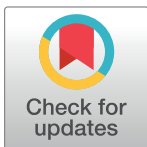

## OPEN ACCESS

**Citation:** Liu C, Ahmad M, Altalbe A (2024) Correction: Anthropological responses to environmental challenges in SAARC nations: A comparative analysis. PLoS ONE 19(2): e0299863. <https://doi.org/10.1371/journal.pone.0299863>

**Published:** February 27, 2024

**Copyright:** © 2024 Liu et al. This is an open access article distributed under the terms of the [Creative Commons Attribution License](https://creativecommons.org/licenses/by/4.0/), which permits unrestricted use, distribution, and reproduction in any medium, provided the original author and source are credited.
